# Supplementary material
Source: HighWire-hosted journal article supplement (https://injuryprevention.bmj.com/content/injuryprev-2020-043943)
Supplement: inline-supplementary-material-1 [file inline-supplementary-material-1.pdf]

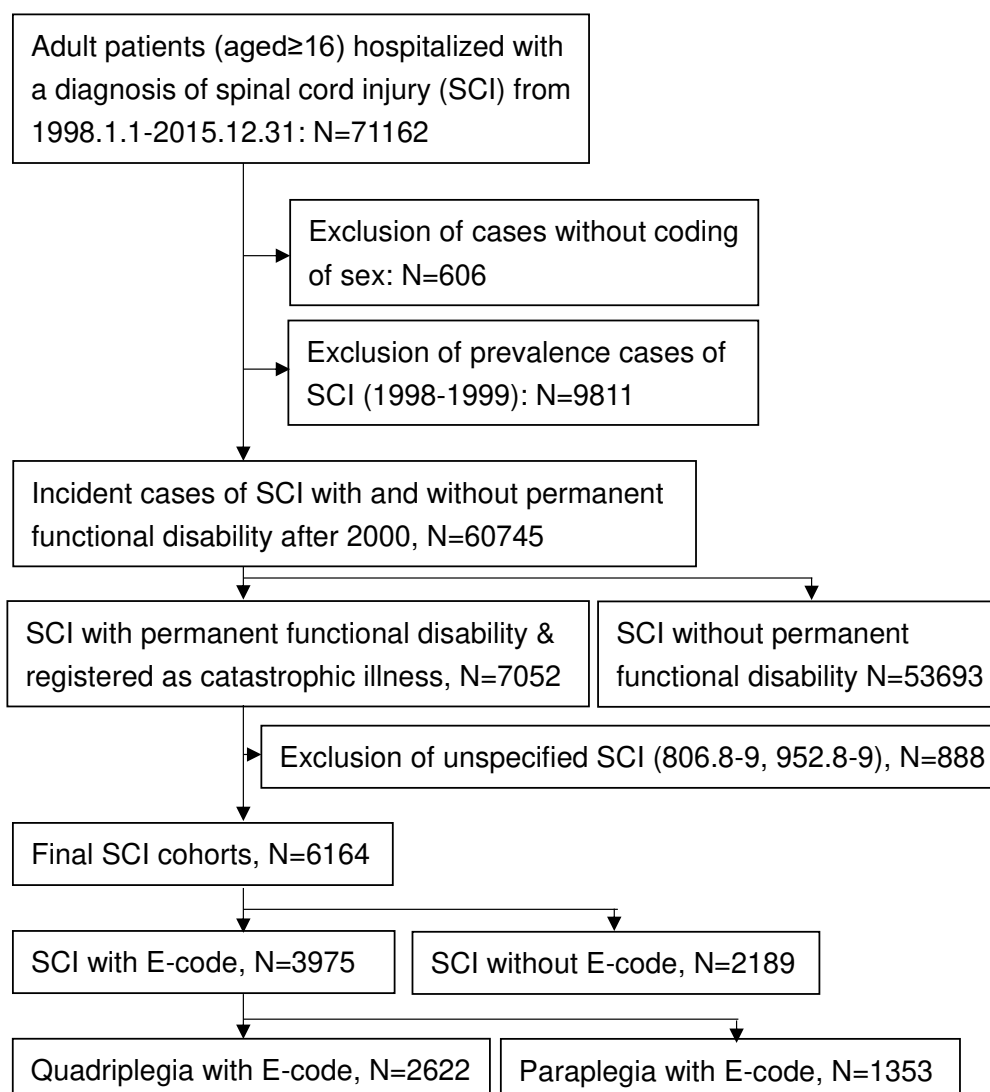

Supplementary Figure 1. Flow diagram showing the establishment of the spinal cord injury (SCI) cohort. ICD-9 (International Classification of Disease, ninth edition) External Cause of Injury Code: E-code.

Supplementary Table 1. Estimated mean survival for 16-year period from rolling-over extrapolation method and Kaplan-Meier (KM) method in the SCI cohort and subcohorts stratified by sex, age, cause, and level of injury.

|                           | 16-year survival based on KM estimate (2000-2015) | Extrapolated survival rate from the first 10 years of follow up (2000-2009) of the same subcohort | Relative bias |
|---------------------------|---------------------------------------------------|---------------------------------------------------------------------------------------------------|---------------|
| All                       | 50.5                                              | 52.2                                                                                              | 3.5%          |
| Sex                       |                                                   |                                                                                                   |               |
| Male                      | 50.4                                              | 50.9                                                                                              | 1.0%          |
| Female                    | 51                                                | 55.8                                                                                              | 9.4%          |
| Age (year)                |                                                   |                                                                                                   |               |
| 16-39                     | 76.4                                              | 74.1                                                                                              | -3.1%         |
| 40-59                     | 52.5                                              | 55.3                                                                                              | 5.9%          |
| 60-99                     | 14.7                                              | 15.1                                                                                              | 3.1%          |
| Traumatic causes          | 53.2                                              | 54.1                                                                                              | 1.6%          |
| MV injuries               | 55.2                                              | 56.3                                                                                              | 2.1%          |
| Falls                     | 49                                                | 48.9                                                                                              | -0.2%         |
| 16-99                     |                                                   |                                                                                                   |               |
| MV-related quadriplegia   | 49.5                                              | 49.1                                                                                              | 0.8%          |
| MV-related paraplegia     | 69.6                                              | 75.3                                                                                              | 8.1%          |
| Fall-related quadriplegia | 44.5                                              | 43.3                                                                                              | -1.8%         |
| Fall-related paraplegia   | 55.7                                              | 55.1                                                                                              | 0.7%          |
| 16-59                     |                                                   |                                                                                                   |               |
| MV-related quadriplegia   | 64                                                | 61.2                                                                                              | -4.4%         |
| MV-related paraplegia     | 73.5                                              | 79.6                                                                                              | 8.3%          |
| Fall-related quadriplegia | 58.2                                              | 61.4                                                                                              | 5.4%          |
| Fall-related paraplegia   | 68.7                                              | 66.2                                                                                              | -3.5%         |

SCI: spinal cord injury; MV: motor vehicle; Relative bias = (extrapolated estimate – KM estimate)/(KM estimate).

Supplementary Table 2. Comparison of life expectancy (LE), loss-of-LE, lifetime medical costs (LMC, US\$ with 3% discount) and cost per year (CPY) for those living with quadriplegia and paraplegia stratified by age and coding with external causes (E-code). Values are numbers of cases (95% confidence interval).

| Age (year) | Category                 | LE (year)           | Loss-of-LE (year)   | LMC (US\$)                | CPY* ( US\$)         |
|------------|--------------------------|---------------------|---------------------|---------------------------|----------------------|
| 16-39      | Quadriplegia             | 28.3 (22.8 to 38.8) | 19.6 (9.2 to 25.3)  | 100784 (87082 to 115480)† | 4268 (3739 to 4690)† |
|            | Paraplegia               | 27.2 (21.9 to 39.3) | 21.6 (9.5 to 27.1)  | 71259 (59588 to 82363)†   | 3066 (2633 to 3509)† |
|            | Quadriplegia with E-code | 21.6 (19.8 to 36.3) | 23.8 (12.2 to 28.3) | 96117 (83952 to 114851)‡  | 4405 (3600 to 5052)  |
|            | Paraplegia with E-code   | 24.6 (19.6 to 36.2) | 24.7 (12.8 to 29.9) | 78658 (69312 to 96826)‡   | 3594 (3176 to 4040)  |
| 40-59      | Quadriplegia             | 18.4 (15.3 to 19.4) | 12.5 (10.0 to 13.9) | 81538 (74890 to 87446)†   | 5165 (4765 to 5446)† |
|            | Paraplegia               | 16.5 (14.9 to 19.4) | 14.6 (11.6 to 16.1) | 68334 (61323 to 77005)†   | 4319 (3818 to 4834)† |
|            | Quadriplegia with E-code | 15.9 (14.4 to 18.1) | 13.3 (11.2 to 15.0) | 76041 (68961 to 84842)    | 5015 (4504 to 5492)  |
|            | Paraplegia with E-code   | 17.3 (14.7 to 24.0) | 13.6 (7.1 to 16.0)  | 80873 (69621 to 96656)    | 4902 (4320 to 5587)  |
| 60-99      | Quadriplegia             | 7.7 (7.2 to 8.2)    | 86.2 (79.6 to 93.2) | 63179 (58751 to 66911)†   | 8268 (7662 to 8875)† |
|            | Paraplegia               | 8.8 (7.6 to 10.3)   | 74.7 (57.7 to 89.4) | 51743 (43623 to 59551)†   | 6006 (5221 to 6857)† |
|            | Quadriplegia with E-code | 8.6 (7.9 to 9.5)    | 6.4 (5.7 to 7.2)    | 62488 (58172 to 67088)    | 7408 (6715 to 7892)  |
|            | Paraplegia with E-code   | 8.8 (7.4 to 11.2)   | 6.3 (4.0 to 7.9)    | 60229 (50473 to 72754)    | 6960 (5803 to 8008)  |

\*: with 3% discount for the numerator and denominator.

†:  $p < .05$ , comparison between quadriplegia and paraplegia.

‡:  $p < .05$ , comparison between quadriplegia with E-code and paraplegia with E-code.

Supplementary Table 3. Comparison of the standardized mortality ratio (SMR), life expectancy (LE), loss-of-LE, lifetime medical costs (LMC, US\$ with 3% discount) and SCI-related LMC for quadriplegia and paraplegia patients (16-99 years old) stratified by motor vehicle (MV) injuries and falls. Values are numbers (95% confidence interval).

|              | No. death | SMR           | LE (year)            | Loss-of-LE (year)    | LMC (US\$)             | SCI-related LMC (US\$) |
|--------------|-----------|---------------|----------------------|----------------------|------------------------|------------------------|
| MV injuries  |           |               |                      |                      |                        |                        |
| Quadriplegia | 384       | 31 (28 to 34) | 16.2 (14.6 to 19.4)  | 15.7 (12.6 to 17.5)* | 80930 (71951 to 88176) | 54073 (48578 to 58402) |
| Paraplegia   | 78        | 36 (28 to 44) | 18.0 (16.3 to 22.1)  | 23.8 (19.5 to 25.9)* | 71759 (65378 to 79552) | 45888 (38874 to 54720) |
| Falls        |           |               |                      |                      |                        |                        |
| Quadriplegia | 275       | 29 (25 to 32) | 15.3 (12.8 to 19.3)* | 11.6 (7.5 to 14.2)*  | 77204 (69575 to 86258) | 54709 (46130 to 63629) |
| Paraplegia   | 127       | 32 (26 to 37) | 26.8 (19.7 to 31.0)* | 7.3 (2.8 to 14.8)*   | 83525 (69628 to 97375) | 55741 (45160 to 69191) |

\*:  $p < .05$ , comparison between quadriplegia and paraplegia.
